# Supplementary material for: Metal phosphide CuP2 as a promising thermoelectric material: an insight from a first-principles study
Source: Royal Society of Chemistry journal article supplement (doi:10.1039/d1nj03624f), 2021-01-01
Supplement: d1nj03624f1.pdf [file d1nj03624f1.pdf]

## Supporting Information – Metal phosphide $\text{CuP}_2$ as a promising thermoelectric material: an insight from first-principles study\*

Un-Gi Jong<sup>a†</sup>, Chol-Hyok Ri<sup>a</sup>, Chol-Jin Pak<sup>a</sup>, Chol-Hyok Kim<sup>a</sup>, Stefaan Cottenier<sup>b</sup>, and Chol-Jun Yu<sup>a‡</sup>

<sup>a</sup>Chair of Computational Materials Design (CMD), Faculty of Materials Science, Kim Il Sung University,  
Pyongyang, PO Box 76, Democratic People's Republic of Korea

<sup>b</sup>Department of Electromechanical, Systems and Metal Engineering & Center for Molecular Modeling (CMM),  
Ghent University, Technologiepark-Zwijnaarde 46, BE-9052 Gent, Belgium

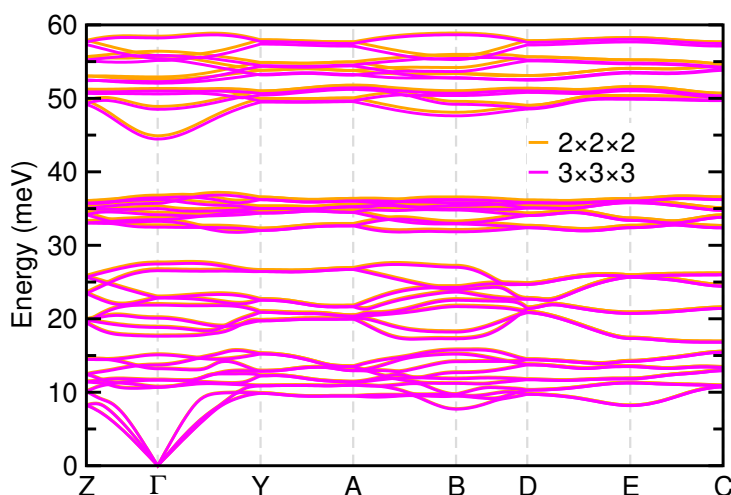

Figure S1. Comparison of harmonic phonon dispersion relations calculated using  $2\times 2\times 2$  (brown-colored lines) and  $3\times 3\times 3$  (pink-colored lines) supercells of monoclinic  $\text{CuP}_2$  at 0 K.

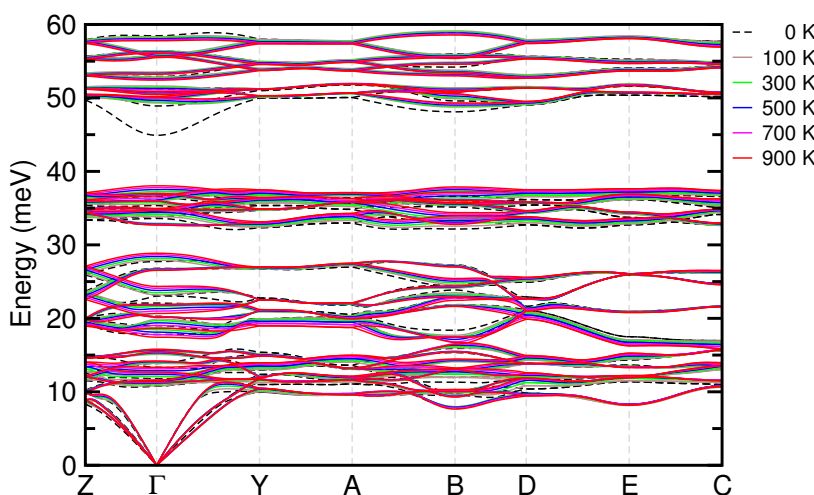

Figure S2. Temperature-dependent anharmonic phonon dispersion curves at different temperatures ranging from 100 to 900 K with an interval of 200 K, compared with harmonic ones for  $\text{CuP}_2$ .

\*Published in New Journal of Chemistry.

<sup>†</sup>Un-Gi Jong, Email: ug.jong@ryongnamsan.edu.kp

<sup>‡</sup>Chol-Jun Yu, Email: cj.yu@ryongnamsan.edu.kp

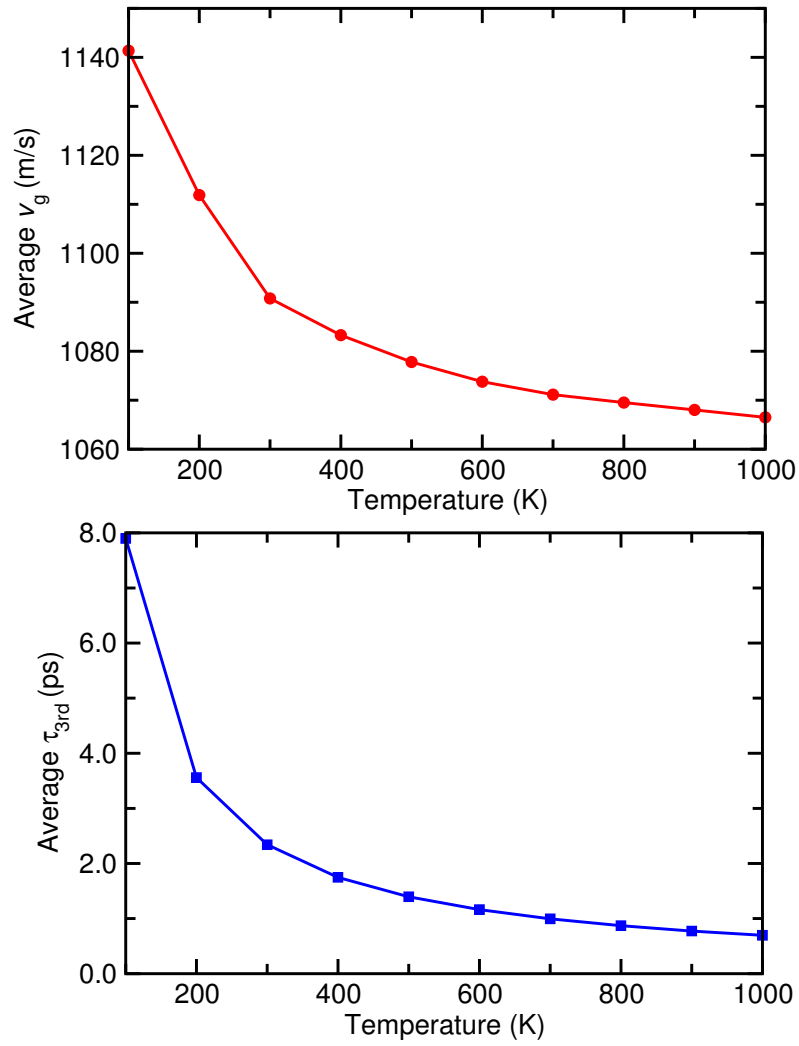

Figure S3. Average phonon lifetime  $\tau_{rd}$  and group velocity  $v_g$  at temperatures from 100 to 1000 K with an interval of 100 K calculated with BTE+SCP method for  $\text{CuP}_2$ .

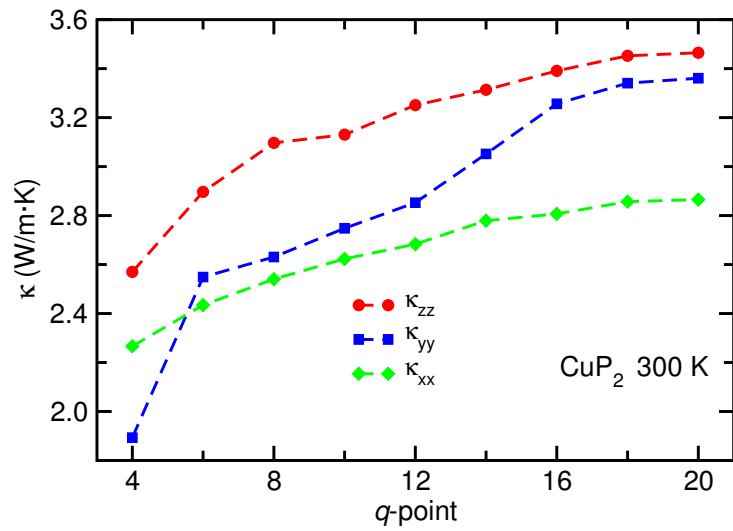

Figure S4. Convergence test for lattice thermal conductivity of  $\text{CuP}_2$  according to the size of  $q$ -point mesh.

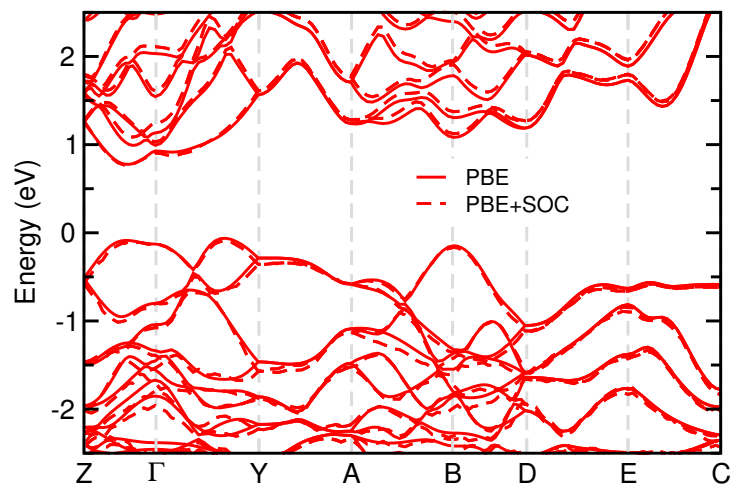

Figure S5. The PBE-calculated electronic band structures with and without the spin-orbit coupling (SOC) effect for  $\text{CuP}_2$ .

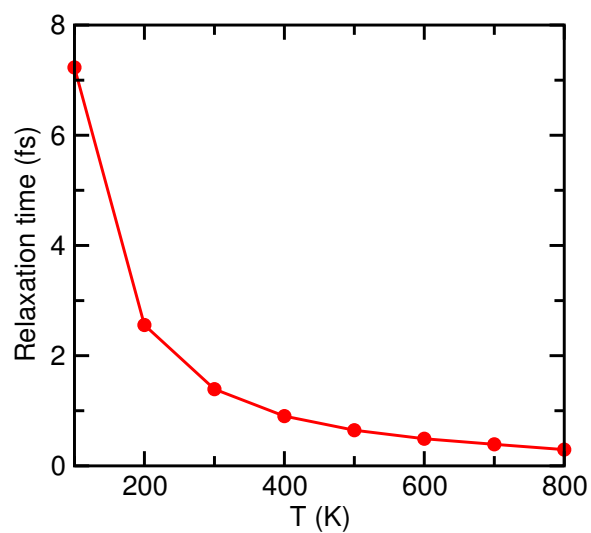

Figure S6. Relaxation time of electron as a function of temperature for  $\text{CuP}_2$ .

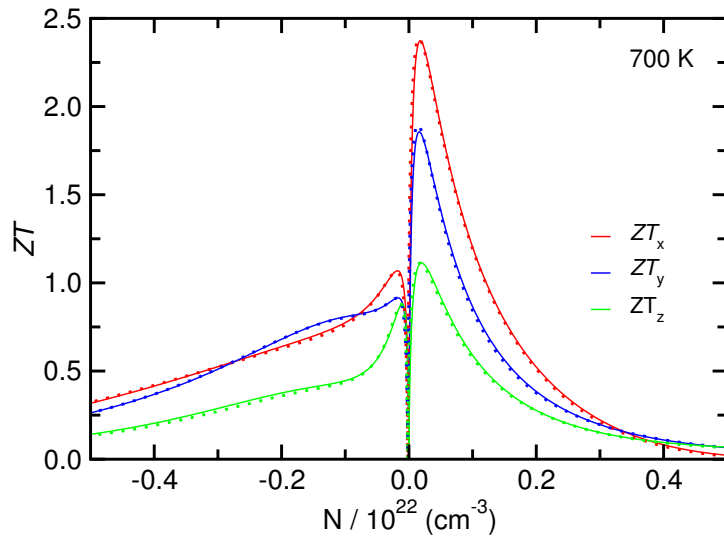

Figure S7. The PBE-calculated figure of merit  $ZT$  using  $k$ -point meshes of  $24 \times 24 \times 16$  (solid) and  $20 \times 20 \times 12$  (dotted) with relaxation time of  $10^{-14}$  s for  $\text{CuP}_2$ .

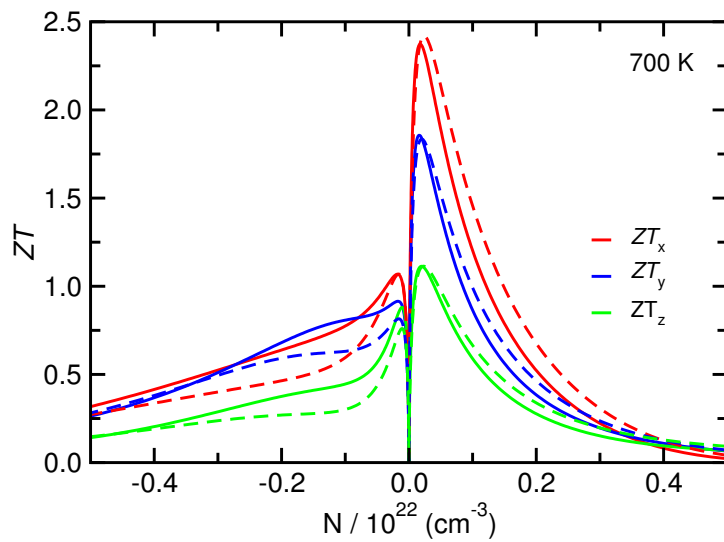

Figure S8. The figure of merit  $ZT$  calculated with the PBE (solid) and mBJ (dashed) functionals setting relaxation time to  $10^{-14}$  s for  $\text{CuP}_2$ .
